# Supplementary material for: Serum FSH as a Useful Marker for the Differential Diagnosis of Ovarian Granulosa Cell Tumors
Source: MDPI journal article supplement (doi:10.3390/cancers14184480), 2022-09-15
Supplement: s1 [file s1]

**Supplemental Table S1.** Histologic subtypes.

| Histologic subtype (n=471)              |                                         | n   |
|-----------------------------------------|-----------------------------------------|-----|
| Serous tumors                           |                                         |     |
|                                         | Cystadenoma                             | 10  |
|                                         | Borderline tumor                        | 7   |
|                                         | Carcinoma                               | 116 |
| Mucinous tumors                         |                                         |     |
|                                         | Cystadenoma                             | 40  |
|                                         | Borderline tumor                        | 29  |
|                                         | Carcinoma                               | 19  |
| Endometrioid tumors                     |                                         |     |
|                                         | Adenofibroma                            | 3   |
|                                         | Borderline tumor                        | 2   |
|                                         | Carcinoma                               | 49  |
| Clear cell tumors                       |                                         |     |
|                                         | Carcinoma                               | 73  |
| Seromucinous tumors                     |                                         |     |
|                                         | Adenofibroma                            | 1   |
|                                         | Borderline tumor                        | 8   |
|                                         | Carcinoma                               | 4   |
| Brenner tumors                          |                                         |     |
|                                         | Benign                                  | 4   |
|                                         | Malignant                               | 2   |
| Other carcinomas                        |                                         |     |
|                                         | Undifferentiated carcinoma              | 1   |
|                                         | Carcinosarcoma                          | 10  |
| Mesenchymal tumors                      |                                         |     |
|                                         | Endometrioid stromal sarcoma, low grade | 1   |
| Mixed epithelial and mesenchymal tumors |                                         |     |
|                                         | Adenosarcoma                            | 1   |
| Sex cord-stromal tumors                 |                                         |     |
| Pure stromal tumors                     |                                         |     |
|                                         | Fibroma                                 | 19  |
|                                         | Thecoma                                 | 4   |
|                                         | Leydig cell tumor                       | 1   |
| Pure sex cord tumors                    |                                         |     |
|                                         | Adult granulosa cell tumor              | 13  |
| Germ cell tumors                        |                                         |     |
|                                         | Teratoma, benign                        | 18  |
|                                         | Immature teratoma                       | 1   |
|                                         | Dysgerminoma                            | 1   |
|                                         | Yolk sac tumor                          | 1   |
|                                         | Struma ovarii                           | 1   |
|                                         | Strumal carcinoid                       | 1   |
| Miscellaneous tumors                    |                                         |     |
|                                         | Small cell carcinoma                    | 1   |
| Endometriosis and derived tumors        |                                         |     |
|                                         | Endometriosis                           | 30  |

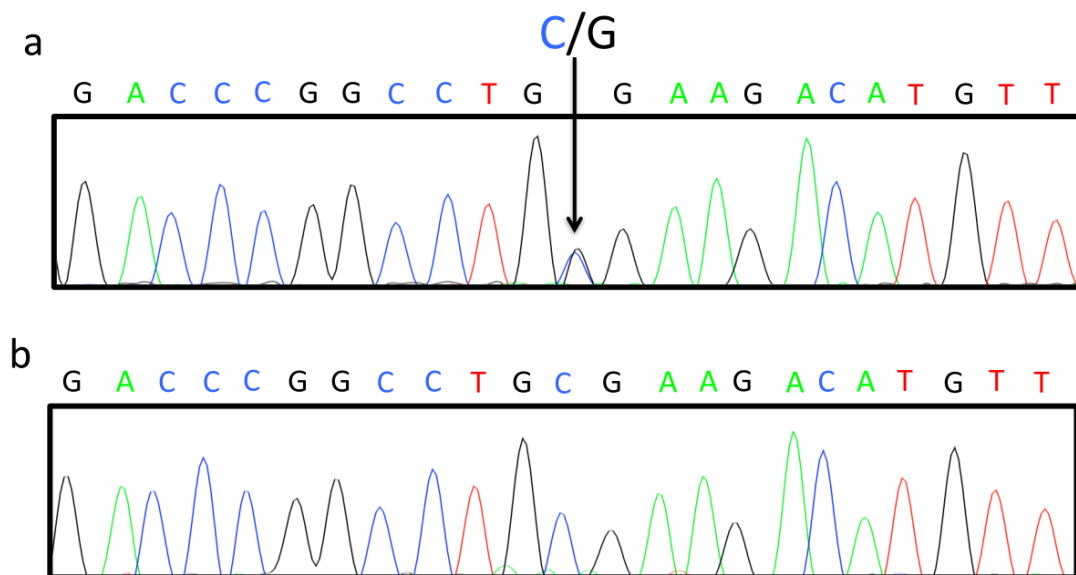

**Supplementary Figure S1.** Mutations of FOXL2 gene codon 134 (p.C134W) in granulosa cell tumors (GCT). Direct DNA sequencing analyses of adult-type GCT with the (a) FOXL2 mutation and (b) without FOXL2 mutation.

**Supplemental Table S2.** Serum hormone levels of GCT group and non GCT group.

| Characteristic        | GCT group (n=13) |                | P<br>value | non-GCT group (n=458) |                | P<br>value |
|-----------------------|------------------|----------------|------------|-----------------------|----------------|------------|
|                       | Premenopausal    | Postmenopausal |            | Premenopausal         | Postmenopausal |            |
|                       | ( n = 7 )        | ( n = 6 )      |            | ( n = 155 )           | ( n = 303 )    |            |
| LH (IU/L)             | 5.0 [0.3-33]     | 3.1 [0.1-24]   | 0.47       | 4.1 [0.1-49]          | 19 [0.1-70]    | < .001     |
| FSH (IU/L)            | 0.9 [0.1-1.8]    | 0.4 [0.1-2.0]  | 0.94       | 6.0 [0.1-89]          | 48 [2.2-150]   | < .001     |
| Teststerone (nmol/L)  | 0.8 [0.5-3.9]    | 0.5 [0.3-0.9]  | 0.19       | 0.3 [0.1-10]          | 0.3 [0.1-11]   | 0.92       |
| Estradiol (pmol/L)    | 83 [17-370]      | 81 [52-280]    | 0.81       | 56 [10-650]           | 16 [10-120]    | < .001     |
| Progesterone (pmol/L) | 0.5 [0.3-4.4]    | 0.4 [0.1-0.7]  | 0.25       | 0.3 [0.1-18]          | 0.2 [0.1-4.7]  | < .001     |

Values are presented as median [range].

GCT, granulosa cell tumor; LH, luteinizing hormone; FSH, follicle stimulating hormone
